# Supplementary material
Source: publisher figshare collection journal article supplement (https://springernature.figshare.com/ndownloader/files/7134497)
Supplement: Supplementary file [file 7134497]

# **An Efficient Algorithm for Identifying Primary Phenotype Attractors of a Large-Scale Boolean Network**

**Sang-Mok Choo<sup>1</sup> and Kwang-Hyun Cho<sup>2,\*</sup>**

<sup>1</sup>Department of Mathematics, University of Ulsan, Ulsan 44610, Republic of Korea

<sup>2</sup>Department of Bio and Brain Engineering, Korea Advanced Institute of Science and Technology (KAIST),

Daejeon 34141, Republic of Korea

## **Supporting information**

### **Apoptosis attractors of the MAPK network**

---

\* Corresponding author, E-mail: [ckh@kaist.ac.kr](mailto:ckh@kaist.ac.kr), Phone: +82-42-350-4325, Fax: +82-42-350-4310, Web: <http://sbic.kaist.ac.kr>

To find attractors for apoptosis phenotype we use the simulation condition r4 in S3 Dataset of [2], which is FGFR3 perturbation with setting values of the four stimuli to zero. Inserting the values (FGFR3, TGFBR stimulus, EGFR stimulus, FGFR3 stimulus, DNA damage)=(1,0,0,0,0) of the external nodes into the update rules for the original network in Additional file 3(a), we found the external condition : the external, secondary-external nodes (ESENs) and the semi-simplified update rules for nodes except ESENs in Additional file 3(b). Due to the update rule Apoptosis\*=!BCL2 & !ERK & FOXO3 & p53, inserting the values (BCL2, ERK, FOXO3, p53)=(0,0,1,1) into the semi-simplified update rules, we found the phenotype condition: the phenotype, secondary-phenotype nodes (PSPNs) and the fully-simplified update rules for 6 nodes in Fig. 6 with no secondary-phenotype equations in Additional file 3(c). The fully-simplified update rules yield the HPFP for apoptosis in Fig. 6, where the HPFP has 4 categories with the maximum value 2 of the numbers of nodes in the SCCs.

The SCCs with more than one node in the HPFP are  $V_{1,1}=\{FRS2, GRB2\}$  and  $V_{3,1}=\{PI3K, GAB1\}$ . The fully-simplified update rules for (FRS2, GRB2) yield that  $V_{1,1}$  has only one attractor  $\llbracket 00, 10, 11, 01 \rrbracket$ , which is cyclic with period 4 in Additional file 3(d). The signal from {GRB2} in  $V_{1,1}$  is transmitted to  $V_{2,1}=\{SOS\}$  with  $SOS^*=GRB2$ . Then  $V_{2,1}$  has the unique attractor  $\llbracket 1,0,0,1 \rrbracket$ . The input signals from {SOS, GRB2} yield a unique attractor of  $V_{3,1}$ , which is the point attractor  $\llbracket 11 \rrbracket$  for (PI3K, GAB1) in Additional file 3(e). Since there is no secondary-phenotype equation, we do not check whether secondary-phenotype equations are satisfied. Therefore we can construct a unique global attractor for apoptosis, which is cyclic with period 4 in Additional file 3(f). We confirm the concatenated state vector becomes a global attractor by applying the original update rules in Additional file 3(f).
